# Supplementary material
Source: publisher site journal article supplement (https://www.dovepress.com/article/157034)
Supplement: Supplementary file 1 [file get_supplementary_file.php]

# Clinical Backfill Funding Scheme Allied Health *Implementation Plan*

**Name:**

**Profession:**

The following tool is a guiding document to assist with planning and support during the funded backfill period to ensure that the expected outcomes are achieved, and individual learning outcomes are maximised.

## Funding Details

**No. weeks HP level/ HP level:**

**Projected dates of funding:**

## Expected Outcomes

**What goals and activities do I hope to accomplish during this period?**

| Goal (e.g., Prepare manuscript ) | Activity<br>(e.g., search current literature, write introduction, complete methods, first draft complete, seek draft feedback) |
|----------------------------------|--------------------------------------------------------------------------------------------------------------------------------|
|                                  |                                                                                                                                |
|                                  |                                                                                                                                |
|                                  |                                                                                                                                |
|                                  |                                                                                                                                |
|                                  |                                                                                                                                |
|                                  |                                                                                                                                |
|                                  |                                                                                                                                |
|                                  |                                                                                                                                |
|                                  |                                                                                                                                |
|                                  |                                                                                                                                |

**Time frame for achieving activities: Gant Chart completed (see p3)?**

Yes      No

**What are the potential risks to completing above activities in specified time frame?**

| Potential risk (e.g., inaccessibility of mentors ) | Contingency<br>(contact mentors in advance to flag dates when needing draft feedback) |
|----------------------------------------------------|---------------------------------------------------------------------------------------|
|                                                    |                                                                                       |
|                                                    |                                                                                       |
|                                                    |                                                                                       |
|                                                    |                                                                                       |
|                                                    |                                                                                       |
|                                                    |                                                                                       |
|                                                    |                                                                                       |
|                                                    |                                                                                       |
|                                                    |                                                                                       |
|                                                    |                                                                                       |

## Resources and Development

Have you thought about where you will be physically located during the backfill period? Has this been discussed with your line manager?

Is there any computer software I require? (i.e., endnote, SPSS, excel 2010)

Are there any **learning resources** I require? (e.g., additional mentorship, workshop training, endnote training)

**Action plan** to obtain these resources:

**I am supportive of the above implementation plan:**

Clinician: \_\_\_\_\_  
Print Name                      Signature

Line Manager Approval: \_\_\_\_\_  
Print Name                      Signature

Research Fellow Approval: \_\_\_\_\_  
Print Name                      Signature

## Timeline - Sample Gant Chart

| Activity                                                   |   | Week 1 |   |   |   |   | Week 2 |   |   |   |   | Week 3 |   |   |   |   | Week 4 |   |   |   |   |
|------------------------------------------------------------|---|--------|---|---|---|---|--------|---|---|---|---|--------|---|---|---|---|--------|---|---|---|---|
|                                                            |   | M      | T | W | T | F | M      | T | W | T | F | M      | T | W | T | F | M      | T | W | T | F |
| e.g., Install endnote                                      | X |        |   |   |   |   |        |   |   |   |   |        |   |   |   |   |        |   |   |   |   |
| Find Guidelines for Authors                                | X |        |   |   |   |   |        |   |   |   |   |        |   |   |   |   |        |   |   |   |   |
| Contact project team re: dates, and plan                   | X |        |   |   |   |   |        |   |   |   |   |        |   |   |   |   |        |   |   |   |   |
| Contact library regarding: literature search               |   |        |   |   |   |   |        |   |   |   |   |        |   |   |   |   |        |   |   |   |   |
| Appraise literature                                        |   | X      | X | X | X |   |        |   |   |   |   |        |   |   |   |   |        |   |   |   |   |
| Introduction                                               |   |        |   | X | X | X | X      |   |   |   |   |        |   |   |   |   |        |   |   |   |   |
| Methods                                                    |   |        |   |   |   |   | X      | X | X | X |   |        |   |   |   |   |        |   |   |   |   |
| Send introduction and methods for feedback to project team |   |        |   |   |   |   |        |   |   |   | X |        |   |   |   |   |        |   |   |   |   |
| Results and discussion and abstract, conclusion            |   |        |   |   |   |   |        |   |   |   |   | X      | X | X | X | X |        |   |   |   |   |
| Send final draft for feedback                              |   |        |   |   |   |   |        |   |   |   |   |        |   |   |   | X |        |   |   |   |   |
| Tidy-up tables and figures and references                  |   |        |   |   |   |   |        |   |   |   |   |        |   |   |   | X | X      | X |   |   |   |
| Complete changes                                           |   |        |   |   |   |   |        |   |   |   |   |        |   |   |   |   |        | X | X |   |   |
